# Supplementary material for: Unintentional falls mortality in China, 2006-2016
Source: PubMed Central journal article supplement (PMC6445498; doi:10.7189/jogh.09.010603), 2019-06
Supplement: jogh-09-010603-s001.pdf [file jogh-09-010603-s001.pdf]

Supplementary Table 1. Crude unintentional falls mortality per 100,000 population by age group and location in China, 2006-2016

| Age group   | Location     | 2006          | 2007          | 2008          | 2009          | 2010          | 2011          | 2012          | 2013         | 2014         | 2015          | 2016          | %change<br>in rate |
|-------------|--------------|---------------|---------------|---------------|---------------|---------------|---------------|---------------|--------------|--------------|---------------|---------------|--------------------|
| 0-4 years   | Urban        | 1.63 (0.26)   | 1.32 (0.23)   | 0.98 (0.2)    | 0.76 (0.18)   | 1.34 (0.23)   | 1.07 (0.21)   | 0.87 (0.19)   | 1.18 (0.22)  | 1.93 (0.35)  | 1.65 (0.32)   | 1.94 (0.34)   | 19 (-25, 90)       |
|             | Rural        | 3.07 (0.37)   | 2.95 (0.36)   | 2.91 (0.36)   | 3.21 (0.37)   | 2.51 (0.33)   | 3.64 (0.41)   | 3.72 (0.43)   | 2.78 (0.37)  | 2.36 (0.28)  | 2.68 (0.3)    | 2.17 (0.27)   | -29 (-50, -1)      |
|             | <b>Ratio</b> | <b>1.9</b>    | <b>2.2</b>    | <b>3.0</b>    | <b>4.2</b>    | <b>1.9</b>    | <b>3.4</b>    | <b>4.3</b>    | <b>2.4</b>   | <b>1.2</b>   | <b>1.6</b>    | <b>1.1</b>    |                    |
| 5-14 years  | Urban        | 0.38 (0.09)   | 0.53 (0.1)    | 0.68 (0.12)   | 0.73 (0.12)   | 0.61 (0.11)   | 0.6 (0.12)    | 0.6 (0.12)    | 0.73 (0.13)  | 0.99 (0.18)  | 0.66 (0.14)   | 0.79 (0.16)   | 107 (15, 274)      |
|             | Rural        | 1.45 (0.18)   | 1.47 (0.18)   | 1.53 (0.19)   | 1.1 (0.16)    | 1.06 (0.16)   | 1.48 (0.2)    | 1.58 (0.2)    | 1.7 (0.21)   | 1.24 (0.15)  | 1.12 (0.15)   | 1.01 (0.14)   | -30 (-51, 0)       |
|             | <b>Ratio</b> | <b>3.8</b>    | <b>2.8</b>    | <b>2.3</b>    | <b>1.5</b>    | <b>1.7</b>    | <b>2.5</b>    | <b>2.6</b>    | <b>2.3</b>   | <b>1.3</b>   | <b>1.7</b>    | <b>1.3</b>    |                    |
| 15-24 years | Urban        | 0.9 (0.11)    | 0.83 (0.11)   | 0.87 (0.11)   | 0.89 (0.11)   | 0.88 (0.11)   | 0.99 (0.12)   | 0.81 (0.11)   | 0.91 (0.12)  | 0.93 (0.12)  | 0.8 (0.11)    | 0.62 (0.1)    | -30 (-53, 4)       |
|             | Rural        | 1.79 (0.16)   | 2.58 (0.2)    | 2.68 (0.2)    | 2.41 (0.2)    | 2.29 (0.19)   | 2.28 (0.19)   | 2.57 (0.2)    | 2.39 (0.19)  | 2.03 (0.17)  | 1.42 (0.15)   | 1.12 (0.13)   | -37 (-53, -16)     |
|             | <b>Ratio</b> | <b>2.0</b>    | <b>3.1</b>    | <b>3.1</b>    | <b>2.7</b>    | <b>2.6</b>    | <b>2.3</b>    | <b>3.2</b>    | <b>2.6</b>   | <b>2.2</b>   | <b>1.8</b>    | <b>1.8</b>    |                    |
| 25-44 years | Urban        | 2.4 (0.14)    | 2.21 (0.13)   | 2.67 (0.14)   | 2.38 (0.14)   | 2.43 (0.14)   | 2.28 (0.13)   | 2.28 (0.13)   | 2.05 (0.12)  | 2.39 (0.14)  | 1.98 (0.13)   | 1.68 (0.11)   | -30 (-41, -17)     |
|             | Rural        | 4.5 (0.19)    | 5.23 (0.2)    | 5.73 (0.21)   | 5.15 (0.2)    | 5.52 (0.21)   | 5.68 (0.21)   | 5.18 (0.2)    | 5.05 (0.2)   | 4.65 (0.19)  | 4.4 (0.18)    | 4.18 (0.18)   | -7 (-17, 4)        |
|             | <b>Ratio</b> | <b>1.9</b>    | <b>2.4</b>    | <b>2.1</b>    | <b>2.2</b>    | <b>2.3</b>    | <b>2.5</b>    | <b>2.3</b>    | <b>2.5</b>   | <b>2.0</b>   | <b>2.2</b>    | <b>2.5</b>    |                    |
| 45-64 years | Urban        | 3.64 (0.21)   | 3.9 (0.21)    | 4.5 (0.22)    | 3.76 (0.2)    | 4.67 (0.22)   | 4.26 (0.2)    | 4.68 (0.21)   | 4.41 (0.19)  | 5.31 (0.22)  | 4.97 (0.22)   | 5.6 (0.23)    | 54 (34, 76)        |
|             | Rural        | 8.46 (0.32)   | 9.18 (0.33)   | 10.68 (0.35)  | 9.94 (0.33)   | 10.6 (0.33)   | 10.47 (0.32)  | 10.94 (0.32)  | 10.6 (0.31)  | 9.19 (0.27)  | 9.04 (0.27)   | 9.7 (0.28)    | 15 (5, 26)         |
|             | <b>Ratio</b> | <b>2.3</b>    | <b>2.4</b>    | <b>2.4</b>    | <b>2.6</b>    | <b>2.3</b>    | <b>2.5</b>    | <b>2.3</b>    | <b>2.4</b>   | <b>1.7</b>   | <b>1.8</b>    | <b>1.7</b>    |                    |
| 65-74 years | Urban        | 9.07 (0.67)   | 8.86 (0.65)   | 10.06 (0.69)  | 9.79 (0.68)   | 9.52 (0.67)   | 9.27 (0.63)   | 10.08 (0.67)  | 11.23 (0.7)  | 13.65 (0.81) | 15.34 (0.85)  | 14.55 (0.79)  | 60 (34, 92)        |
|             | Rural        | 23.54 (1.05)  | 22.87 (1.03)  | 22.33 (1.01)  | 18.9 (0.93)   | 21.12 (0.98)  | 17.69 (0.84)  | 21.18 (0.94)  | 18.18 (0.86) | 18.44 (0.82) | 18.83 (0.82)  | 18.54 (0.77)  | -21 (-30, -11)     |
|             | <b>Ratio</b> | <b>2.6</b>    | <b>2.6</b>    | <b>2.2</b>    | <b>1.9</b>    | <b>2.2</b>    | <b>1.9</b>    | <b>2.1</b>    | <b>1.6</b>   | <b>1.4</b>   | <b>1.2</b>    | <b>1.3</b>    |                    |
| 75+ years   | Urban        | 84.84 (3.15)  | 85.88 (3.1)   | 94.94 (3.21)  | 93.08 (3.1)   | 97.77 (3.13)  | 94.02 (2.93)  | 90.68 (2.65)  | 89.33 (2.55) | 98.99 (2.6)  | 106.58 (2.69) | 110.44 (2.58) | 30 (19, 42)        |
|             | Rural        | 126.81 (3.33) | 125.59 (3.31) | 124.27 (3.24) | 125.26 (3.19) | 118.49 (3.06) | 104.05 (2.65) | 100.96 (2.47) | 95.66 (2.34) | 95.44 (2.31) | 114.45 (2.51) | 118.13 (2.4)  | -7 (-13, -1)       |
|             | <b>Ratio</b> | <b>1.5</b>    | <b>1.5</b>    | <b>1.3</b>    | <b>1.4</b>    | <b>1.2</b>    | <b>1.1</b>    | <b>1.1</b>    | <b>1.1</b>   | <b>1.0</b>   | <b>1.1</b>    | <b>1.1</b>    |                    |

Notes:

1. \*: % change in rate and its 95% CI that was calculated as “mortality rate ratio (MRR) -1”;
2. Abbreviations: FSLs: Falls on same level from slipping, tripping and stumbling (W01); FRF: Furniture related falls (W06-W08); OFSL: other falls on same level (W00, W02-W05, W09 and W18); FSS: Falls on and from stairs and steps (W10); FBS: falls from, out of or through building or structure (W13); OFOL: other falls from one level to another (W11, W12 and W14-W17); UF: unspecified falls(W19).

**Supplementary Table 2. Crude unintentional falls mortality per 100,000 population by age group and sex in China, 2006-2016**

| Age group   | Sex          | 2006          | 2007          | 2008          | 2009          | 2010          | 2011          | 2012         | 2013         | 2014         | 2015          | 2016          | %change<br>in rate |
|-------------|--------------|---------------|---------------|---------------|---------------|---------------|---------------|--------------|--------------|--------------|---------------|---------------|--------------------|
| 0-4 years   | Male         | 2.85 (0.35)   | 2.31 (0.31)   | 2.45 (0.32)   | 2.13 (0.29)   | 2.33 (0.3)    | 3.26 (0.37)   | 2.44 (0.32)  | 2.16 (0.3)   | 2.29 (0.3)   | 2.74 (0.33)   | 2.49 (0.31)   | -12 (-38, 23)      |
|             | Female       | 1.80 (0.28)   | 1.87 (0.29)   | 1.32 (0.24)   | 1.74 (0.27)   | 1.45 (0.25)   | 1.26 (0.24)   | 1.86 (0.3)   | 1.61 (0.28)  | 2.12 (0.32)  | 1.83 (0.3)    | 1.61 (0.28)   | -10 (-43, 41)      |
|             | <b>Ratio</b> | <b>1.6</b>    | <b>1.2</b>    | <b>1.9</b>    | <b>1.2</b>    | <b>1.6</b>    | <b>2.6</b>    | <b>1.3</b>   | <b>1.4</b>   | <b>1.1</b>   | <b>1.5</b>    | <b>1.6</b>    |                    |
| 5-14 years  | Male         | 1.15 (0.15)   | 1.4 (0.17)    | 1.48 (0.17)   | 1.14 (0.15)   | 1.15 (0.16)   | 1.36 (0.18)   | 1.43 (0.18)  | 1.32 (0.17)  | 1.44 (0.18)  | 1.16 (0.16)   | 1.17 (0.16)   | 1 (-30, 47)        |
|             | Female       | 0.60 (0.12)   | 0.48 (0.11)   | 0.63 (0.12)   | 0.63 (0.12)   | 0.45 (0.1)    | 0.62 (0.13)   | 0.62 (0.13)  | 1.01 (0.16)  | 0.81 (0.14)  | 0.71 (0.13)   | 0.65 (0.13)   | 9 (-37, 86)        |
|             | <b>Ratio</b> | <b>1.9</b>    | <b>2.9</b>    | <b>2.4</b>    | <b>1.8</b>    | <b>2.6</b>    | <b>2.2</b>    | <b>2.3</b>   | <b>1.3</b>   | <b>1.8</b>   | <b>1.6</b>    | <b>1.8</b>    |                    |
| 15-24 years | Male         | 2.13 (0.18)   | 2.72 (0.2)    | 2.84 (0.2)    | 2.67 (0.2)    | 2.46 (0.19)   | 2.56 (0.19)   | 2.68 (0.2)   | 2.45 (0.19)  | 2.39 (0.19)  | 1.73 (0.16)   | 1.35 (0.14)   | -37 (-51, -18)     |
|             | Female       | 0.52 (0.09)   | 0.57 (0.09)   | 0.56 (0.09)   | 0.49 (0.09)   | 0.57 (0.1)    | 0.58 (0.09)   | 0.63 (0.1)   | 0.77 (0.11)  | 0.59 (0.1)   | 0.48 (0.09)   | 0.38 (0.08)   | -27 (-57, 24)      |
|             | <b>Ratio</b> | <b>4.1</b>    | <b>4.8</b>    | <b>5.0</b>    | <b>5.4</b>    | <b>4.3</b>    | <b>4.5</b>    | <b>4.3</b>   | <b>3.2</b>   | <b>4.0</b>   | <b>3.6</b>    | <b>3.6</b>    |                    |
| 25-44 years | Male         | 5.85 (0.21)   | 6.09 (0.22)   | 7.1 (0.23)    | 6.36 (0.22)   | 6.58 (0.23)   | 6.5 (0.22)    | 6.31 (0.22)  | 5.88 (0.21)  | 5.87 (0.21)  | 5.35 (0.2)    | 4.93 (0.19)   | -16 (-24, -6)      |
|             | Female       | 1.06 (0.09)   | 1.22 (0.1)    | 1.16 (0.1)    | 1.04 (0.09)   | 1.23 (0.1)    | 1.32 (0.1)    | 1.02 (0.09)  | 1.1 (0.09)   | 1.19 (0.1)   | 1.05 (0.09)   | 0.89 (0.08)   | -16 (-34, 8)       |
|             | <b>Ratio</b> | <b>5.5</b>    | <b>5.0</b>    | <b>6.1</b>    | <b>6.1</b>    | <b>5.3</b>    | <b>4.9</b>    | <b>6.2</b>   | <b>5.3</b>   | <b>4.9</b>   | <b>5.1</b>    | <b>5.5</b>    |                    |
| 45-64 years | Male         | 9.39 (0.33)   | 10.05 (0.34)  | 11.87 (0.36)  | 10.97 (0.34)  | 12.29 (0.35)  | 12.01 (0.33)  | 12.33 (0.34) | 12.09 (0.32) | 12.13 (0.32) | 11.71 (0.32)  | 12.52 (0.33)  | 33 (22, 45)        |
|             | Female       | 2.65 (0.18)   | 2.79 (0.18)   | 3.04 (0.19)   | 2.50 (0.16)   | 2.74 (0.17)   | 2.43 (0.15)   | 2.99 (0.17)  | 2.65 (0.15)  | 2.54 (0.15)  | 2.51 (0.15)   | 2.91 (0.16)   | 10 (-7, 30)        |
|             | <b>Ratio</b> | <b>3.6</b>    | <b>3.6</b>    | <b>3.9</b>    | <b>4.4</b>    | <b>4.5</b>    | <b>5.0</b>    | <b>4.1</b>   | <b>4.6</b>   | <b>4.8</b>   | <b>4.7</b>    | <b>4.3</b>    |                    |
| 65-74 years | Male         | 21.41 (1.03)  | 20.02 (0.98)  | 21.58 (1.01)  | 20.86 (0.99)  | 20.74 (0.99)  | 18.45 (0.89)  | 21.56 (0.97) | 20.29 (0.94) | 21.5 (0.96)  | 24.6 (1.02)   | 23.56 (0.94)  | 10 (-3, 24)        |
|             | Female       | 11.82 (0.75)  | 11.97 (0.75)  | 11.12 (0.71)  | 8.19 (0.61)   | 10.29 (0.68)  | 9.16 (0.6)    | 10.26 (0.66) | 9.58 (0.63)  | 11.49 (0.68) | 10.5 (0.65)   | 10.54 (0.61)  | -11 (-25, 5)       |
|             | <b>Ratio</b> | <b>1.8</b>    | <b>1.7</b>    | <b>1.9</b>    | <b>2.6</b>    | <b>2.0</b>    | <b>2.0</b>    | <b>2.1</b>   | <b>2.1</b>   | <b>1.9</b>   | <b>2.3</b>    | <b>2.2</b>    |                    |
| 75+ years   | Male         | 102.34 (3.46) | 104.04 (3.42) | 106.11 (3.39) | 102.26 (3.25) | 105.19 (3.25) | 101.05 (3.04) | 93.69 (2.69) | 89.18 (2.55) | 95.57 (2.58) | 104.83 (2.69) | 111.03 (2.61) | 8 (0, 18)          |
|             | Female       | 113.65 (3.16) | 111.44 (3.12) | 115.56 (3.13) | 118.04 (3.09) | 112.66 (2.98) | 98.83 (2.59)  | 98.6 (2.44)  | 95.77 (2.35) | 98.22 (2.33) | 115.71 (2.51) | 117.56 (2.38) | 3 (-3, 11)         |
|             | <b>Ratio</b> | <b>0.9</b>    | <b>0.9</b>    | <b>0.9</b>    | <b>0.9</b>    | <b>0.9</b>    | <b>1.0</b>    | <b>1.0</b>   | <b>0.9</b>   | <b>1.0</b>   | <b>0.9</b>    | <b>0.9</b>    |                    |

Notes:

1. \*: % change in rate and its 95% CI that was calculated as “mortality rate ratio (MRR) -1”;
2. Abbreviations: FSLs: Falls on same level from slipping, tripping and stumbling (W01); FRF: Furniture related falls (W06-W08); OFSL: other falls on same level (W00, W02-W05, W09 and W18); FSS: Falls on and from stairs and steps (W10); FBS: falls from, out of or through building or structure (W13); OFOL: other falls from one level to another (W11, W12 and W14-W17); UF: unspecified falls(W19).

**Supplementary Table 3. Mortality rate from unintentional falls per 100,000 population (standard error) by mechanism and location in China, 2006-2016**

| Mechanism | Location     | 2006        | 2007        | 2008        | 2009        | 2010        | 2011        | 2012        | 2013        | 2014        | 2015        | 2016        | %change in rate<br>(95% CI) |
|-----------|--------------|-------------|-------------|-------------|-------------|-------------|-------------|-------------|-------------|-------------|-------------|-------------|-----------------------------|
| FSLs      | Urban        | 1.19 (0.06) | 1.3 (0.07)  | 1.56 (0.07) | 1.50 (0.07) | 1.86 (0.08) | 1.74 (0.07) | 1.71 (0.07) | 1.82 (0.07) | 2.17 (0.08) | 2.40 (0.08) | 2.58 (0.08) | 116 (91, 145)               |
|           | Rural        | 1.96 (0.06) | 2.17 (0.07) | 2.44 (0.07) | 2.56 (0.07) | 2.49 (0.07) | 2.38 (0.07) | 2.57 (0.07) | 2.33 (0.07) | 2.53 (0.07) | 3.20 (0.08) | 3.45 (0.09) | 76 (62, 91)                 |
|           | <b>Ratio</b> | <b>1.6</b>  | <b>1.7</b>  | <b>1.6</b>  | <b>1.7</b>  | <b>1.3</b>  | <b>1.4</b>  | <b>1.5</b>  | <b>1.3</b>  | <b>1.2</b>  | <b>1.3</b>  | <b>1.3</b>  |                             |
| FRF       | Urban        | 0.19 (0.03) | 0.14 (0.02) | 0.21 (0.03) | 0.25 (0.03) | 0.2 (0.03)  | 0.16 (0.02) | 0.16 (0.02) | 0.15 (0.02) | 0.20 (0.02) | 0.22 (0.02) | 0.20 (0.02) | 2 (-28, 44)                 |
|           | Rural        | 0.26 (0.02) | 0.2 (0.02)  | 0.3 (0.02)  | 0.27 (0.02) | 0.3 (0.02)  | 0.25 (0.02) | 0.21 (0.02) | 0.22 (0.02) | 0.21 (0.02) | 0.28 (0.03) | 0.25 (0.02) | -7 (-28, 20)                |
|           | <b>Ratio</b> | <b>1.4</b>  | <b>1.4</b>  | <b>1.4</b>  | <b>1.1</b>  | <b>1.5</b>  | <b>1.6</b>  | <b>1.3</b>  | <b>1.5</b>  | <b>1.1</b>  | <b>1.3</b>  | <b>1.3</b>  |                             |
| OFSL      | Urban        | 0.46 (0.04) | 0.48 (0.04) | 0.74 (0.05) | 0.56 (0.04) | 0.67 (0.05) | 0.82 (0.05) | 0.79 (0.05) | 0.59 (0.04) | 0.6 (0.04)  | 0.69 (0.04) | 0.69 (0.04) | 52 (23, 87)                 |
|           | Rural        | 0.75 (0.04) | 0.7 (0.04)  | 0.77 (0.04) | 0.58 (0.03) | 0.7 (0.04)  | 0.64 (0.04) | 0.53 (0.03) | 0.71 (0.04) | 0.59 (0.04) | 0.53 (0.03) | 0.52 (0.03) | -30 (-41, -17)              |
|           | <b>Ratio</b> | <b>1.6</b>  | <b>1.5</b>  | <b>1.0</b>  | <b>1.0</b>  | <b>1.0</b>  | <b>0.8</b>  | <b>0.7</b>  | <b>1.2</b>  | <b>1.0</b>  | <b>0.8</b>  | <b>0.8</b>  |                             |
| FSS       | Urban        | 0.34 (0.03) | 0.32 (0.03) | 0.68 (0.05) | 0.62 (0.05) | 0.46 (0.04) | 0.32 (0.03) | 0.34 (0.03) | 0.46 (0.04) | 0.48 (0.04) | 0.47 (0.04) | 0.47 (0.03) | 36 (6, 74)                  |
|           | Rural        | 0.62 (0.04) | 0.63 (0.04) | 1.11 (0.05) | 1.19 (0.05) | 0.97 (0.04) | 0.95 (0.05) | 0.99 (0.05) | 0.83 (0.04) | 0.8 (0.04)  | 0.72 (0.04) | 0.65 (0.04) | 5 (-11, 23)                 |
|           | <b>Ratio</b> | <b>1.8</b>  | <b>2.0</b>  | <b>1.6</b>  | <b>1.9</b>  | <b>2.1</b>  | <b>3.0</b>  | <b>2.9</b>  | <b>1.8</b>  | <b>1.7</b>  | <b>1.5</b>  | <b>1.4</b>  |                             |
| FBS       | Urban        | 1.01 (0.06) | 0.86 (0.05) | 1.05 (0.06) | 0.91 (0.06) | 1.05 (0.06) | 0.96 (0.05) | 0.97 (0.05) | 0.89 (0.05) | 1.12 (0.05) | 0.93 (0.05) | 0.94 (0.05) | -7 (-21, 8)                 |
|           | Rural        | 1.78 (0.06) | 2.17 (0.07) | 2.31 (0.07) | 2.20 (0.07) | 2.28 (0.07) | 2.32 (0.07) | 2.41 (0.07) | 2.32 (0.07) | 1.93 (0.07) | 1.68 (0.06) | 1.58 (0.06) | -11 (-20, -2)               |
|           | <b>Ratio</b> | <b>1.8</b>  | <b>2.5</b>  | <b>2.2</b>  | <b>2.4</b>  | <b>2.2</b>  | <b>2.4</b>  | <b>2.5</b>  | <b>2.6</b>  | <b>1.7</b>  | <b>1.8</b>  | <b>1.7</b>  |                             |
| OFOL      | Urban        | 1.09 (0.06) | 1.04 (0.06) | 0.98 (0.06) | 0.93 (0.06) | 0.92 (0.06) | 0.94 (0.05) | 0.96 (0.05) | 1.01 (0.05) | 1.09 (0.05) | 0.97 (0.05) | 1.03 (0.05) | -6 (-19, 9)                 |
|           | Rural        | 2.03 (0.07) | 2.07 (0.07) | 2.19 (0.07) | 2.00 (0.06) | 2.27 (0.07) | 2.15 (0.07) | 1.97 (0.07) | 1.92 (0.06) | 1.74 (0.06) | 1.76 (0.06) | 1.78 (0.06) | -12 (-20, -4)               |
|           | <b>Ratio</b> | <b>1.9</b>  | <b>2.0</b>  | <b>2.2</b>  | <b>2.2</b>  | <b>2.5</b>  | <b>2.3</b>  | <b>2.1</b>  | <b>1.9</b>  | <b>1.6</b>  | <b>1.8</b>  | <b>1.7</b>  |                             |
| UF        | Urban        | 1.04 (0.06) | 1.19 (0.06) | 0.80 (0.05) | 0.89 (0.05) | 0.89 (0.06) | 0.82 (0.05) | 0.82 (0.05) | 0.75 (0.05) | 0.88 (0.05) | 0.93 (0.05) | 0.84 (0.05) | -19 (-30, -5)               |
|           | Rural        | 2.36 (0.07) | 2.29 (0.07) | 1.58 (0.06) | 1.30 (0.05) | 1.21 (0.05) | 0.97 (0.05) | 1.08 (0.05) | 0.90 (0.04) | 0.82 (0.04) | 0.89 (0.04) | 0.95 (0.05) | -60 (-64, -55)              |
|           | <b>Ratio</b> | <b>2.3</b>  | <b>1.9</b>  | <b>2.0</b>  | <b>1.5</b>  | <b>1.4</b>  | <b>1.2</b>  | <b>1.3</b>  | <b>1.2</b>  | <b>0.9</b>  | <b>1.0</b>  | <b>1.1</b>  |                             |

Notes:

1. % change in rate and its 95% CI that was calculated as “mortality rate ratio (MRR) -1”;

2. Abbreviations: FSLs: Falls on same level from slipping, tripping and stumbling (W01); FRF: Furniture related falls (W06-W08); OFSL: other falls on same level (W00, W02-W05, W09 and W18); FSS: Falls on and from stairs and steps (W10); FBS: falls from, out of or through building or structure (W13); OFOL: other falls from one level to another (W11, W12 and W14-W17); UF: unspecified falls(W19).

**Supplementary Table 4. Mortality rate from unintentional falls per 100,000 population (standard error) by mechanism and sex in China, 2006-2016**

| Mechanism   | Location     | 2006        | 2007        | 2008        | 2009        | 2010        | 2011        | 2012        | 2013        | 2014        | 2015        | 2016        | %change in rate<br>(95% CI) |
|-------------|--------------|-------------|-------------|-------------|-------------|-------------|-------------|-------------|-------------|-------------|-------------|-------------|-----------------------------|
| <b>FSLs</b> | Male         | 1.61 (0.06) | 1.72 (0.07) | 2.07 (0.07) | 2.1 (0.07)  | 2.21 (0.07) | 2.29 (0.07) | 2.30 (0.07) | 2.19 (0.07) | 2.56 (0.08) | 3.07 (0.09) | 3.27 (0.09) | 103 (85, 124)               |
|             | Female       | 1.57 (0.06) | 1.77 (0.07) | 1.93 (0.07) | 1.98 (0.07) | 2.13 (0.07) | 1.85 (0.07) | 2.00 (0.07) | 1.95 (0.07) | 2.15 (0.07) | 2.57 (0.08) | 2.81 (0.08) | 79 (62, 98)                 |
|             | <b>Ratio</b> | <b>1.0</b>  | <b>1.0</b>  | <b>1.1</b>  | <b>1.1</b>  | <b>1.0</b>  | <b>1.2</b>  | <b>1.2</b>  | <b>1.1</b>  | <b>1.2</b>  | <b>1.2</b>  | <b>1.2</b>  |                             |
| <b>FRF</b>  | Male         | 0.21 (0.02) | 0.15 (0.02) | 0.25 (0.03) | 0.21 (0.02) | 0.22 (0.02) | 0.21 (0.02) | 0.19 (0.02) | 0.21 (0.02) | 0.22 (0.02) | 0.27 (0.03) | 0.25 (0.02) | 18 (-11, 58)                |
|             | Female       | 0.24 (0.03) | 0.19 (0.02) | 0.25 (0.03) | 0.29 (0.03) | 0.28 (0.03) | 0.2 (0.02)  | 0.18 (0.02) | 0.16 (0.02) | 0.18 (0.02) | 0.24 (0.02) | 0.19 (0.02) | -19 (-40, 10)               |
|             | <b>Ratio</b> | <b>0.9</b>  | <b>0.8</b>  | <b>1.0</b>  | <b>0.7</b>  | <b>0.8</b>  | <b>1.1</b>  | <b>1.1</b>  | <b>1.3</b>  | <b>1.2</b>  | <b>1.1</b>  | <b>1.3</b>  |                             |
| <b>OFSL</b> | Male         | 0.63 (0.04) | 0.68 (0.04) | 0.80 (0.05) | 0.62 (0.04) | 0.82 (0.05) | 0.81 (0.04) | 0.74 (0.04) | 0.72 (0.04) | 0.69 (0.04) | 0.67 (0.04) | 0.73 (0.04) | 15 (-3, 36)                 |
|             | Female       | 0.58 (0.04) | 0.51 (0.04) | 0.68 (0.04) | 0.50 (0.04) | 0.54 (0.04) | 0.60 (0.04) | 0.55 (0.04) | 0.56 (0.04) | 0.50 (0.04) | 0.52 (0.04) | 0.47 (0.03) | -20 (-34, -3)               |
|             | <b>Ratio</b> | <b>1.1</b>  | <b>1.3</b>  | <b>1.2</b>  | <b>1.2</b>  | <b>1.5</b>  | <b>1.4</b>  | <b>1.3</b>  | <b>1.3</b>  | <b>1.4</b>  | <b>1.3</b>  | <b>1.6</b>  |                             |
| <b>FSS</b>  | Male         | 0.60 (0.04) | 0.54 (0.04) | 1.10 (0.05) | 1.06 (0.05) | 0.90 (0.05) | 0.84 (0.05) | 0.82 (0.04) | 0.83 (0.04) | 0.84 (0.04) | 0.75 (0.04) | 0.68 (0.04) | 14 (-4, 36)                 |
|             | Female       | 0.38 (0.03) | 0.42 (0.03) | 0.69 (0.04) | 0.75 (0.04) | 0.53 (0.04) | 0.46 (0.03) | 0.51 (0.04) | 0.47 (0.03) | 0.48 (0.03) | 0.47 (0.03) | 0.45 (0.03) | 19 (-4, 49)                 |
|             | <b>Ratio</b> | <b>1.6</b>  | <b>1.3</b>  | <b>1.6</b>  | <b>1.4</b>  | <b>1.7</b>  | <b>1.8</b>  | <b>1.6</b>  | <b>1.8</b>  | <b>1.8</b>  | <b>1.6</b>  | <b>1.5</b>  |                             |
| <b>FBS</b>  | Male         | 2.20 (0.08) | 2.36 (0.08) | 2.73 (0.08) | 2.56 (0.08) | 2.69 (0.08) | 2.67 (0.08) | 2.76 (0.08) | 2.57 (0.08) | 2.47 (0.08) | 2.17 (0.07) | 2.06 (0.07) | -7 (-15, 3)                 |
|             | Female       | 0.61 (0.04) | 0.65 (0.04) | 0.60 (0.04) | 0.51 (0.04) | 0.59 (0.04) | 0.57 (0.04) | 0.57 (0.04) | 0.60 (0.04) | 0.63 (0.04) | 0.49 (0.03) | 0.47 (0.03) | -24 (-37, -7)               |
|             | <b>Ratio</b> | <b>3.6</b>  | <b>3.6</b>  | <b>4.6</b>  | <b>5.0</b>  | <b>4.6</b>  | <b>4.7</b>  | <b>4.8</b>  | <b>4.3</b>  | <b>3.9</b>  | <b>4.4</b>  | <b>4.4</b>  |                             |
| <b>OFOL</b> | Male         | 2.42 (0.08) | 2.32 (0.08) | 2.47 (0.08) | 2.33 (0.08) | 2.51 (0.08) | 2.43 (0.08) | 2.33 (0.07) | 2.25 (0.07) | 2.26 (0.07) | 2.21 (0.07) | 2.24 (0.07) | -7 (-15, 1)                 |
|             | Female       | 0.75 (0.04) | 0.78 (0.05) | 0.68 (0.04) | 0.60 (0.04) | 0.68 (0.04) | 0.66 (0.04) | 0.60 (0.04) | 0.66 (0.04) | 0.61 (0.04) | 0.57 (0.04) | 0.61 (0.04) | -19 (-32, -4)               |
|             | <b>Ratio</b> | <b>3.2</b>  | <b>3.0</b>  | <b>3.6</b>  | <b>3.9</b>  | <b>3.7</b>  | <b>3.7</b>  | <b>3.9</b>  | <b>3.4</b>  | <b>3.7</b>  | <b>3.9</b>  | <b>3.7</b>  |                             |
| <b>UF</b>   | Male         | 1.83 (0.07) | 2.06 (0.07) | 1.37 (0.06) | 1.19 (0.05) | 1.18 (0.05) | 1.01 (0.05) | 1.06 (0.05) | 0.93 (0.05) | 0.96 (0.05) | 0.95 (0.05) | 0.99 (0.05) | -46 (-52, -39)              |
|             | Female       | 1.60 (0.07) | 1.43 (0.06) | 1.04 (0.05) | 1.00 (0.05) | 0.92 (0.05) | 0.77 (0.04) | 0.83 (0.05) | 0.70 (0.04) | 0.72 (0.04) | 0.84 (0.05) | 0.78 (0.04) | -51 (-57, -44)              |
|             | <b>Ratio</b> | <b>1.1</b>  | <b>1.4</b>  | <b>1.3</b>  | <b>1.2</b>  | <b>1.3</b>  | <b>1.3</b>  | <b>1.3</b>  | <b>1.3</b>  | <b>1.3</b>  | <b>1.1</b>  | <b>1.3</b>  |                             |

Notes:

1. % change in rate and its 95% CI that was calculated as “mortality rate ratio (MRR) -1”;

2. Abbreviations: FSLs: Falls on same level from slipping, tripping and stumbling (W01); FRF: Furniture related falls (W06-W08); OFSL: other falls on same level (W00, W02-W05, W09 and W18); FSS: Falls on and from stairs and steps (W10); FBS: falls from, out of or through building or structure (W13); OFOL: other falls from one level to another (W11, W12 and W14-W17); UF: unspecified falls(W19).

**Supplementary Table 5. Unintentional falls mortality per 100,000 population (standard error) by age group and mechanism in China, 2006-2016**

| Age group   | Mechanism | 2006        | 2007        | 2008        | 2009        | 2010        | 2011        | 2012        | 2013        | 2014        | 2015        | 2016        | %change in rate<br>(95% CI) |                 |
|-------------|-----------|-------------|-------------|-------------|-------------|-------------|-------------|-------------|-------------|-------------|-------------|-------------|-----------------------------|-----------------|
| 0-4 years   | FSLS      | 0.11 (0.05) | 0.09 (0.04) | 0.13 (0.05) | 0.31 (0.08) | 0.10 (0.05) | 0.22 (0.07) | 0.22 (0.07) | 0.18 (0.06) | 0.28 (0.08) | 0.26 (0.08) | 0.22 (0.07) | 101 (-31, 489)              |                 |
|             | FRF       | 0.32 (0.08) | 0.17 (0.06) | 0.15 (0.06) | 0.13 (0.05) | 0.25 (0.07) | 0.34 (0.09) | 0.20 (0.07) | 0.24 (0.07) | 0.24 (0.07) | 0.33 (0.08) | 0.09 (0.04) | -73 (-91, -19)              |                 |
|             | OFSL      | 0.06 (0.04) | 0.11 (0.05) | 0.06 (0.04) | 0.06 (0.04) | 0.12 (0.05) | 0.09 (0.04) | 0.13 (0.05) | 0.13 (0.05) | 0.13 (0.05) | 0.15 (0.06) | 0.11 (0.05) | 0.06 (0.04)                 | 1 (-80, 399)    |
|             | FSS       | 0.28 (0.08) | 0.3 (0.08)  | 0.23 (0.07) | 0.29 (0.08) | 0.20 (0.06) | 0.29 (0.08) | 0.31 (0.08) | 0.11 (0.05) | 0.33 (0.08) | 0.15 (0.06) | 0.17 (0.06) | 0.17 (0.06)                 | -38 (-74, 49)   |
|             | FBS       | 0.54 (0.11) | 0.56 (0.11) | 0.49 (0.10) | 0.50 (0.10) | 0.53 (0.10) | 0.58 (0.11) | 0.61 (0.12) | 0.6 (0.12)  | 0.6 (0.12)  | 0.57 (0.11) | 0.77 (0.13) | 0.67 (0.12)                 | 25 (-26, 111)   |
|             | OFOL      | 0.84 (0.13) | 0.47 (0.1)  | 0.68 (0.12) | 0.61 (0.11) | 0.51 (0.10) | 0.65 (0.12) | 0.63 (0.12) | 0.6 (0.12)  | 0.6 (0.12)  | 0.53 (0.11) | 0.59 (0.11) | 0.78 (0.13)                 | -7 (-41, 46)    |
|             | UF        | 0.19 (0.06) | 0.41 (0.09) | 0.17 (0.06) | 0.04 (0.03) | 0.18 (0.06) | 0.13 (0.05) | 0.07 (0.04) | 0.04 (0.03) | 0.04 (0.03) | 0.11 (0.05) | 0.11 (0.05) | 0.11 (0.05)                 | -44 (-81, 67)   |
| 5-14 years  | FSLS      | 0.04 (0.02) | 0.09 (0.03) | 0.13 (0.04) | 0.04 (0.02) | 0.07 (0.03) | 0.09 (0.03) | 0.01 (0.01) | 0.08 (0.03) | 0.11 (0.04) | 0.07 (0.03) | 0.06 (0.03) | 0.06 (0.03)                 | 39 (-63, 416)   |
|             | FRF       | -           | -           | 0.02 (0.02) | 0.01 (0.01) | -           | -           | 0.01 (0.01) | 0.05 (0.02) | 0.02 (0.02) | 0.01 (0.01) | 0.01 (0.01) | 0.02 (0.02)                 | -               |
|             | OFSL      | 0.06 (0.03) | 0.1 (0.03)  | 0.04 (0.02) | 0.09 (0.03) | 0.03 (0.02) | 0.02 (0.02) | 0.11 (0.04) | 0.06 (0.03) | 0.06 (0.03) | 0.06 (0.03) | 0.01 (0.01) | 0.05 (0.02)                 | -26 (-79, 162)  |
|             | FSS       | 0.03 (0.02) | 0.12 (0.04) | 0.15 (0.04) | 0.11 (0.03) | 0.08 (0.03) | 0.06 (0.03) | 0.17 (0.04) | 0.08 (0.03) | 0.08 (0.03) | 0.14 (0.04) | 0.08 (0.03) | 0.09 (0.03)                 | 195 (-22, 1014) |
|             | FBS       | 0.25 (0.05) | 0.26 (0.05) | 0.37 (0.06) | 0.25 (0.05) | 0.31 (0.06) | 0.39 (0.07) | 0.43 (0.07) | 0.5 (0.08)  | 0.5 (0.08)  | 0.51 (0.08) | 0.32 (0.06) | 0.38 (0.07)                 | 48 (-13, 151)   |
|             | OFOL      | 0.40 (0.07) | 0.30 (0.06) | 0.27 (0.05) | 0.33 (0.06) | 0.28 (0.06) | 0.42 (0.07) | 0.28 (0.06) | 0.39 (0.07) | 0.25 (0.05) | 0.39 (0.07) | 0.39 (0.07) | 0.22 (0.05)                 | -45 (-68, -4)   |
|             | UF        | 0.10 (0.03) | 0.11 (0.03) | 0.09 (0.03) | 0.07 (0.03) | 0.06 (0.02) | 0.04 (0.02) | 0.05 (0.02) | 0.02 (0.02) | 0.02 (0.02) | 0.06 (0.03) | 0.06 (0.03) | 0.11 (0.04)                 | 11 (-56, 179)   |
| 15-24 years | FSLS      | 0.04 (0.02) | 0.07 (0.02) | 0.10 (0.03) | 0.05 (0.02) | 0.12 (0.03) | 0.13 (0.03) | 0.11 (0.03) | 0.11 (0.03) | 0.09 (0.03) | 0.09 (0.03) | 0.10 (0.03) | 0.10 (0.03)                 | 168 (-5, 650)   |
|             | FRF       | 0.01 (0.01) | 0.01 (0.01) | 0.02 (0.01) | 0.01 (0.01) | 0.01 (0.01) | 0.02 (0.01) | -           | 0.02 (0.01) | 0.02 (0.01) | -           | 0.02 (0.01) | 0.02 (0.01)                 | 209 (-68, 2867) |
|             | OFSL      | 0.06 (0.02) | 0.07 (0.02) | 0.07 (0.02) | 0.02 (0.01) | 0.03 (0.02) | 0.08 (0.02) | 0.03 (0.01) | 0.05 (0.02) | 0.05 (0.02) | 0.08 (0.02) | 0.06 (0.02) | 0.04 (0.02)                 | -36 (-79, 97)   |
|             | FSS       | 0.03 (0.01) | 0.05 (0.02) | 0.09 (0.03) | 0.12 (0.03) | 0.11 (0.03) | 0.15 (0.03) | 0.14 (0.03) | 0.09 (0.03) | 0.09 (0.03) | 0.05 (0.02) | 0.06 (0.02) | 0.03 (0.02)                 | 3 (-74, 311)    |
|             | FBS       | 0.56 (0.06) | 0.71 (0.07) | 0.86 (0.08) | 0.84 (0.08) | 0.73 (0.08) | 0.71 (0.07) | 0.88 (0.08) | 0.71 (0.07) | 0.73 (0.08) | 0.73 (0.08) | 0.40 (0.06) | 0.34 (0.05)                 | -40 (-58, -12)  |
|             | OFOL      | 0.40 (0.05) | 0.49 (0.06) | 0.54 (0.06) | 0.46 (0.06) | 0.5 (0.06)  | 0.46 (0.06) | 0.47 (0.06) | 0.47 (0.06) | 0.57 (0.07) | 0.47 (0.06) | 0.47 (0.06) | 0.31 (0.05)                 | -24 (-49, 15)   |
|             | UF        | 0.24 (0.04) | 0.26 (0.04) | 0.08 (0.02) | 0.11 (0.03) | 0.05 (0.02) | 0.06 (0.02) | 0.03 (0.01) | 0.08 (0.02) | 0.07 (0.02) | 0.07 (0.02) | 0.04 (0.02) | 0.04 (0.02)                 | -84 (-94, -59)  |
| 25-44 years | FSLS      | 0.16 (0.02) | 0.18 (0.03) | 0.28 (0.03) | 0.31 (0.03) | 0.25 (0.03) | 0.32 (0.03) | 0.28 (0.03) | 0.23 (0.03) | 0.26 (0.03) | 0.38 (0.04) | 0.34 (0.04) | 116 (48, 214)               |                 |
|             | FRF       | 0.02 (0.01) | 0.02 (0.01) | 0.03 (0.01) | 0.02 (0.01) | 0.04 (0.01) | 0.03 (0.01) | 0.02 (0.01) | 0.03 (0.01) | 0.02 (0.01) | 0.03 (0.01) | 0.03 (0.01) | 0.03 (0.01)                 | 39 (-56, 338)   |
|             | OFSL      | 0.13 (0.02) | 0.16 (0.02) | 0.12 (0.02) | 0.10 (0.02) | 0.17 (0.03) | 0.17 (0.02) | 0.12 (0.02) | 0.15 (0.02) | 0.10 (0.02) | 0.13 (0.02) | 0.08 (0.02) | 0.08 (0.02)                 | -38 (-65, 8)    |
|             | FSS       | 0.19 (0.03) | 0.14 (0.02) | 0.32 (0.04) | 0.31 (0.03) | 0.22 (0.03) | 0.21 (0.03) | 0.22 (0.03) | 0.22 (0.03) | 0.25 (0.03) | 0.25 (0.03) | 0.15 (0.02) | 0.18 (0.03)                 | -5 (-36, 42)    |
|             | FBS       | 1.48 (0.08) | 1.46 (0.08) | 1.69 (0.08) | 1.57 (0.08) | 1.68 (0.08) | 1.80 (0.08) | 1.69 (0.08) | 1.59 (0.08) | 1.62 (0.08) | 1.62 (0.08) | 1.26 (0.07) | 1.09 (0.07)                 | -26 (-37, -14)  |
|             | OFOL      | 1.16 (0.07) | 1.24 (0.07) | 1.46 (0.08) | 1.24 (0.07) | 1.35 (0.07) | 1.17 (0.07) | 1.21 (0.07) | 1.07 (0.06) | 1.07 (0.06) | 1.05 (0.06) | 1.12 (0.07) | 1.09 (0.07)                 | -6 (-21, 10)    |
|             | UF        | 0.31 (0.04) | 0.49 (0.04) | 0.27 (0.03) | 0.19 (0.03) | 0.23 (0.03) | 0.26 (0.03) | 0.16 (0.02) | 0.20 (0.03) | 0.20 (0.03) | 0.25 (0.03) | 0.15 (0.02) | 0.13 (0.02)                 | -58 (-72, -37)  |
| 45-64 years | FSLS      | 0.61 (0.06) | 0.62 (0.06) | 0.83 (0.07) | 0.82 (0.07) | 0.99 (0.07) | 1.05 (0.07) | 1.12 (0.07) | 0.91 (0.06) | 1.07 (0.07) | 1.29 (0.07) | 1.48 (0.08) | 142 (95, 202)               |                 |
|             | FRF       | 0.08 (0.02) | 0.07 (0.02) | 0.12 (0.03) | 0.07 (0.02) | 0.10 (0.02) | 0.05 (0.02) | 0.10 (0.02) | 0.06 (0.02) | 0.07 (0.02) | 0.07 (0.02) | 0.07 (0.02) | 0.08 (0.02)                 | -5 (-53, 92)    |

|             |      |              |              |              |              |              |              |              |              |              |              |              |                |
|-------------|------|--------------|--------------|--------------|--------------|--------------|--------------|--------------|--------------|--------------|--------------|--------------|----------------|
|             | OFSL | 0.26 (0.04)  | 0.34 (0.04)  | 0.43 (0.05)  | 0.28 (0.04)  | 0.36 (0.04)  | 0.39 (0.04)  | 0.36 (0.04)  | 0.46 (0.04)  | 0.43 (0.04)  | 0.36 (0.04)  | 0.41 (0.04)  | 60 (12, 129)   |
|             | FSS  | 0.33 (0.04)  | 0.39 (0.05)  | 0.74 (0.06)  | 0.68 (0.06)  | 0.68 (0.06)  | 0.56 (0.05)  | 0.72 (0.06)  | 0.64 (0.05)  | 0.57 (0.05)  | 0.58 (0.05)  | 0.58 (0.05)  | 76 (29, 141)   |
|             | FBS  | 1.86 (0.10)  | 1.99 (0.11)  | 2.54 (0.12)  | 2.42 (0.11)  | 2.69 (0.12)  | 2.49 (0.11)  | 2.76 (0.11)  | 2.60 (0.11)  | 2.45 (0.10)  | 2.33 (0.10)  | 2.34 (0.10)  | 26 (9, 44)     |
|             | OFOL | 1.93 (0.11)  | 1.94 (0.11)  | 2.23 (0.11)  | 1.90 (0.10)  | 2.17 (0.10)  | 2.23 (0.10)  | 2.09 (0.1)   | 2.26 (0.10)  | 2.32 (0.10)  | 2.01 (0.09)  | 2.24 (0.10)  | 16 (1, 33)     |
|             | UF   | 0.96 (0.08)  | 1.14 (0.08)  | 0.64 (0.06)  | 0.63 (0.06)  | 0.59 (0.05)  | 0.53 (0.05)  | 0.61 (0.05)  | 0.52 (0.05)  | 0.51 (0.05)  | 0.52 (0.05)  | 0.67 (0.05)  | -31 (-45, -14) |
| 65-74 years | FSLs | 3.55 (0.29)  | 3.69 (0.30)  | 4.24 (0.31)  | 3.47 (0.28)  | 4.22 (0.31)  | 3.37 (0.26)  | 4.53 (0.31)  | 4.26 (0.30)  | 5.24 (0.33)  | 6.43 (0.36)  | 6.30 (0.34)  | 78 (46, 115)   |
|             | FRF  | 0.41 (0.10)  | 0.26 (0.08)  | 0.28 (0.08)  | 0.42 (0.10)  | 0.30 (0.08)  | 0.25 (0.07)  | 0.41 (0.09)  | 0.34 (0.08)  | 0.27 (0.07)  | 0.39 (0.09)  | 0.49 (0.09)  | 20 (-35, 120)  |
|             | OFSL | 1.40 (0.18)  | 0.83 (0.14)  | 1.96 (0.21)  | 1.02 (0.15)  | 1.50 (0.19)  | 1.75 (0.19)  | 1.52 (0.18)  | 1.29 (0.16)  | 1.47 (0.17)  | 1.21 (0.16)  | 1.44 (0.16)  | 3 (-27, 44)    |
|             | FSS  | 1.28 (0.18)  | 1.44 (0.18)  | 2.21 (0.23)  | 2.26 (0.23)  | 2.26 (0.23)  | 1.71 (0.19)  | 1.82 (0.20)  | 1.90 (0.20)  | 2.11 (0.21)  | 1.80 (0.19)  | 1.68 (0.17)  | 31 (-7, 84)    |
|             | FBS  | 2.27 (0.23)  | 2.56 (0.25)  | 2.12 (0.22)  | 2.07 (0.22)  | 2.07 (0.22)  | 2.06 (0.21)  | 2.53 (0.23)  | 2.13 (0.21)  | 2.09 (0.21)  | 2.25 (0.21)  | 1.91 (0.19)  | -16 (-36, 11)  |
|             | OFOL | 3.79 (0.30)  | 3.50 (0.29)  | 2.77 (0.25)  | 2.93 (0.26)  | 3.18 (0.27)  | 2.96 (0.25)  | 2.83 (0.25)  | 3.17 (0.26)  | 3.07 (0.25)  | 3.05 (0.25)  | 3.06 (0.24)  | -19 (-35, 0)   |
|             | UF   | 3.79 (0.30)  | 3.67 (0.29)  | 2.70 (0.25)  | 2.26 (0.23)  | 1.89 (0.21)  | 1.54 (0.18)  | 2.12 (0.21)  | 1.71 (0.19)  | 2.11 (0.21)  | 2.19 (0.21)  | 1.95 (0.19)  | -49 (-60, -34) |
| ≥75 years   | FSLs | 35.25 (1.33) | 39.42 (1.39) | 42.95 (1.43) | 45.67 (1.44) | 47.54 (1.45) | 44.31 (1.31) | 44.93 (1.23) | 45.01 (1.20) | 50.04 (1.24) | 59.52 (1.35) | 65.26 (1.32) | 85 (70, 101)   |
|             | FRF  | 4.81 (0.49)  | 3.68 (0.43)  | 5.56 (0.51)  | 5.95 (0.52)  | 5.43 (0.49)  | 4.43 (0.42)  | 3.60 (0.35)  | 3.56 (0.34)  | 4.34 (0.37)  | 5.57 (0.41)  | 4.68 (0.35)  | -3 (-24, 25)   |
|             | OFSL | 12.27 (0.78) | 11.44 (0.75) | 14.21 (0.82) | 11.53 (0.72) | 12.93 (0.76) | 12.99 (0.71) | 12.01 (0.64) | 11.49 (0.61) | 10.29 (0.56) | 11.41 (0.59) | 11.16 (0.55) | -9 (-22, 7)    |
|             | FSS  | 7.41 (0.61)  | 6.63 (0.57)  | 13.02 (0.79) | 13.8 (0.79)  | 9.22 (0.64)  | 8.91 (0.59)  | 7.81 (0.51)  | 8.09 (0.51)  | 8.19 (0.50)  | 8.58 (0.51)  | 7.29 (0.44)  | -2 (-20, 20)   |
|             | FBS  | 5.31 (0.52)  | 6.68 (0.57)  | 4.99 (0.49)  | 3.86 (0.42)  | 4.24 (0.43)  | 3.42 (0.36)  | 2.27 (0.28)  | 3.27 (0.32)  | 2.89 (0.30)  | 2.34 (0.27)  | 2.85 (0.28)  | -46 (-59, -30) |
|             | OFOL | 10.21 (0.72) | 9.77 (0.69)  | 7.27 (0.59)  | 8.40 (0.62)  | 9.05 (0.63)  | 8.67 (0.58)  | 7.50 (0.50)  | 6.16 (0.44)  | 6.50 (0.45)  | 6.06 (0.43)  | 6.80 (0.43)  | -33 (-45, -20) |
|             | UF   | 33.55 (1.30) | 30.58 (1.23) | 23.42 (1.05) | 21.88 (1.00) | 20.97 (0.96) | 17.04 (0.81) | 18.33 (0.79) | 15.28 (0.70) | 14.78 (0.67) | 17.44 (0.73) | 16.65 (0.67) | -50 (-56, -45) |

Notes:

1. % change in rate and its 95% CI that was calculated as “mortality rate ratio (MRR) -1”;
2. Abbreviations: FSLs: Falls on same level from slipping, tripping and stumbling (W01); FRF: Furniture related falls (W06-W08); OFSL: other falls on same level (W00, W02-W05, W09 and W18); FSS: Falls on and from stairs and steps (W10); FBS: falls from, out of or through building or structure (W13); OFOL: other falls from one level to another (W11, W12 and W14-W17); UF: unspecified falls(W19).
